# Supplementary material
Source: PubMed Central journal article supplement (PMC3329213)

## Web Appendix

Seasonal Variation of Chemical Constituents Associated With Short-term  
Mortality Effects of PM<sub>2.5</sub> in Xi'an, A Central City in China

Wei Huang, Junji Cao, Yebin Tao, Lingzhen Dai, Shou-En Lu, Bin Hou, Zheng  
Wang, Tong Zhu

Author affiliations: College of Environmental Sciences and Engineering, and  
Center for Environment and Health, Peking University, Beijing, China (Wei  
Huang, Yebin Tao, Lingzhen Dai, Tong Zhu); Institute of Earth and  
Environment, Chinese Academy of Sciences, Xi'an, Shanxi Province, China  
(Junji Cao); Department of Biostatistics, University of Medicine and Dentistry of  
New Jersey, Piscataway, New Jersey (Shou-En Lu); Xi'an Center for Disease  
Control and Prevention, Xi'an, Shanxi Province, China (Bin Hou, Zheng  
Wang).

## **Table of Contents:**

Web Table 1. Spearman Correlations of PM<sub>2.5</sub> Mass and Elements in Xi'an, China (2006-2008).

Web Table 2. Spearman Correlations of PM<sub>2.5</sub> Mass and Anions in Xi'an, China (2006).

Web Table 3. Sensitivity Analysis of Differential PM<sub>2.5</sub> Exclusion Cutoff Applied.

Web Figure 1. Proportions of Major Species in PM<sub>2.5</sub> Measured in Xi'an, China, 2006.

Web Figure 2. Excess relative risk<sup>a</sup> (%) of all-age all-cause mortality per IQR increases in selected PM<sub>2.5</sub> species estimated by individual-lag model, in Xi'an, China, 2006-2008.

Web Figure 3. Excess relative risk<sup>a</sup> (%) of all-age cardiovascular mortality per IQR increases in selected PM<sub>2.5</sub> species estimated by individual-lag model, in Xi'an, China, 2006-2008.

Web Figure 4. Excess relative risk<sup>a</sup> (%) of all-age respiratory mortality per IQR increases in selected PM<sub>2.5</sub> species estimated by individual-lag model, in Xi'an, China, 2006-2008.

Web Figure 5. Excess relative risk<sup>a</sup> (%) of all-age coronary mortality per IQR increases in selected PM<sub>2.5</sub> species estimated by individual-lag model, in Xi'an, China, 2006-2008.

Web Table 1. Spearman Correlations of PM<sub>2.5</sub> Mass and Elements in Xi'an, China, 2006-2008.

|                   | PM <sub>2.5</sub> | OC   | EC   | S    | Cl   | Br   | K    | Ca    | Cr   | Mn   | Fe   | Ni   | Zn   | Cd   | Pb   |
|-------------------|-------------------|------|------|------|------|------|------|-------|------|------|------|------|------|------|------|
| PM <sub>2.5</sub> | 1.00              | 0.80 | 0.73 | 0.76 | 0.67 | 0.60 | 0.73 | 0.25  | 0.44 | 0.65 | 0.53 | 0.23 | 0.58 | 0.19 | 0.77 |
| OC                |                   | 1.00 | 0.74 | 0.56 | 0.78 | 0.68 | 0.73 | 0.31  | 0.48 | 0.67 | 0.51 | 0.23 | 0.62 | 0.20 | 0.72 |
| EC                |                   |      | 1.00 | 0.58 | 0.73 | 0.69 | 0.61 | 0.29  | 0.44 | 0.66 | 0.53 | 0.25 | 0.68 | 0.21 | 0.74 |
| S                 |                   |      |      | 1.00 | 0.41 | 0.39 | 0.51 | -0.09 | 0.29 | 0.38 | 0.18 | 0.07 | 0.42 | 0.16 | 0.66 |
| Cl                |                   |      |      |      | 1.00 | 0.76 | 0.70 | 0.42  | 0.42 | 0.76 | 0.59 | 0.21 | 0.79 | 0.21 | 0.73 |
| Br                |                   |      |      |      |      | 1.00 | 0.55 | 0.25  | 0.35 | 0.61 | 0.45 | 0.25 | 0.62 | 0.12 | 0.63 |
| K                 |                   |      |      |      |      |      | 1.00 | 0.60  | 0.46 | 0.75 | 0.75 | 0.27 | 0.52 | 0.16 | 0.65 |
| Ca                |                   |      |      |      |      |      |      | 1.00  | 0.27 | 0.64 | 0.87 | 0.30 | 0.38 | 0.13 | 0.27 |
| Cr                |                   |      |      |      |      |      |      |       | 1.00 | 0.49 | 0.39 | 0.25 | 0.34 | 0.15 | 0.39 |
| Mn                |                   |      |      |      |      |      |      |       |      | 1.00 | 0.84 | 0.26 | 0.74 | 0.23 | 0.69 |
| Fe                |                   |      |      |      |      |      |      |       |      |      | 1.00 | 0.31 | 0.56 | 0.20 | 0.53 |
| Ni                |                   |      |      |      |      |      |      |       |      |      |      | 1.00 | 0.14 | 0.08 | 0.26 |
| Zn                |                   |      |      |      |      |      |      |       |      |      |      |      | 1.00 | 0.28 | 0.73 |
| Cd                |                   |      |      |      |      |      |      |       |      |      |      |      |      | 1.00 | 0.30 |
| Pb                |                   |      |      |      |      |      |      |       |      |      |      |      |      |      | 1.00 |

PM<sub>2.5</sub>: particulate matter less than 2.5 μm in aerodynamic diameter.

Web Table 2. Spearman Correlations of PM<sub>2.5</sub> Mass and Anions in Xi'an, China, 2006.

|                   | PM <sub>2.5</sub> | ammonium | sulfate | nitrate |
|-------------------|-------------------|----------|---------|---------|
| PM <sub>2.5</sub> | 1.00              | 0.66     | 0.69    | 0.76    |
| ammonium          |                   | 1.00     | 0.96    | 0.89    |
| Sulfate           |                   |          | 1.00    | 0.85    |
| nitrate           |                   |          |         | 1.00    |

PM<sub>2.5</sub>: particulate matter less than 2.5 μm in aerodynamic diameter.

Web Table 3. Sensitivity Analysis of Excess Relative Risk for All-Cause All-Age Mortality per  $10\mu\text{g}/\text{m}^3$  Increase in  $\text{PM}_{2.5}$  Concentration Averaged over Lag 1-2 Days.

| All-age all-cause mortality<br>whole year           | ER <sup>a</sup> | 95% CI     |
|-----------------------------------------------------|-----------------|------------|
| Omit $\text{PM}_{2.5} > 95$ percentile              | 0.17            | 0.00, 0.33 |
| Omit $\text{PM}_{2.5} > 75$ percentile              | 0.06            | 0.23, 0.35 |
| Omit $\text{PM}_{2.5} > 300 \mu\text{g}/\text{m}^3$ | 0.20            | 0.00, 0.39 |
| Natural spline with (8,3,4) df                      | 0.19            | 0.06, 0.31 |
| Natural spline with (7,4,4) df                      | 0.20            | 0.07, 0.33 |

CI: confidence interval.  $\text{PM}_{2.5}$ : particulate matter less than  $2.5 \mu\text{m}$  in aerodynamic diameter. df: degree of freedom. <sup>a</sup>: Adjusted for temperature, RH, DOW and time trend.

Web Figure 1. Proportions of major species in PM<sub>2.5</sub> measured in Xi'an, China, 2006. PM<sub>2.5</sub>: particulate matter less than 2.5 μm in aerodynamic diameter.

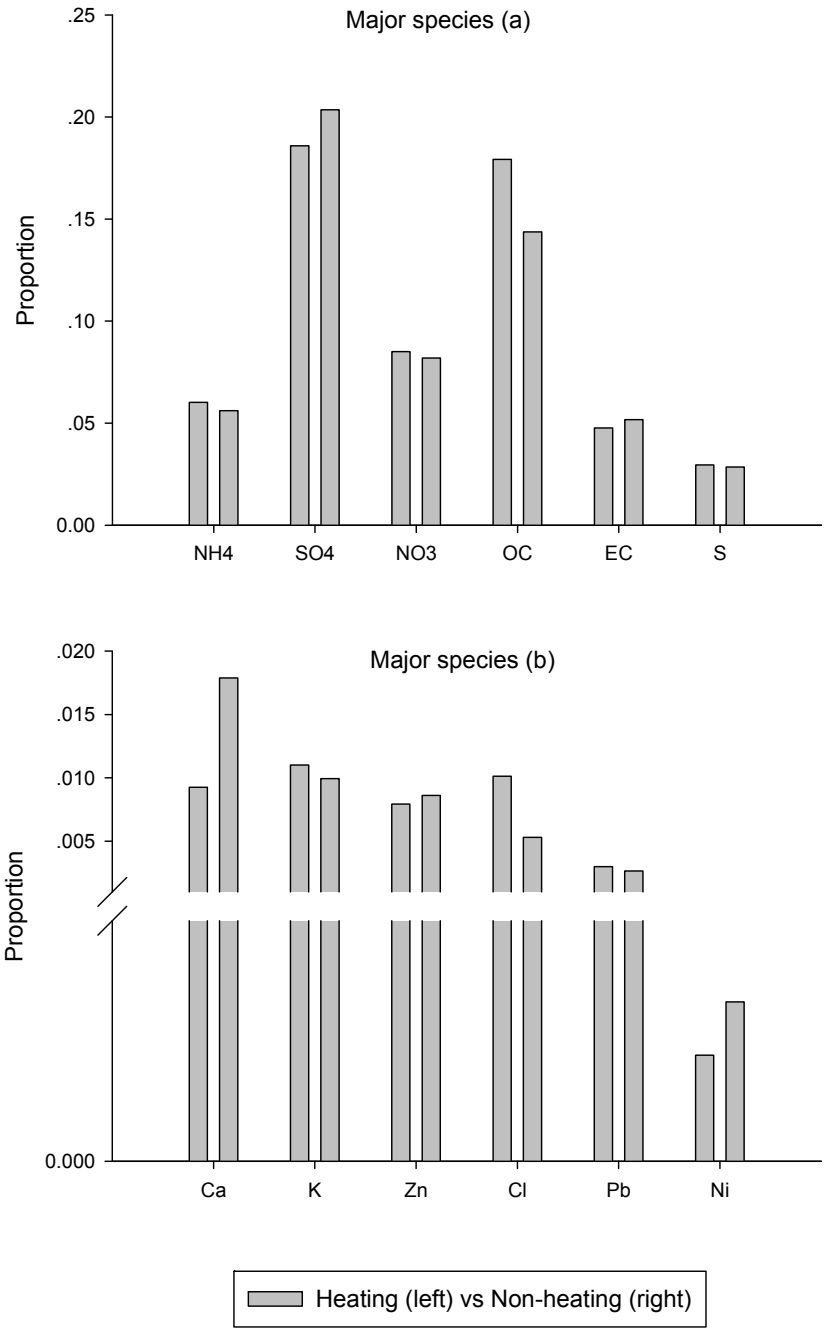

Web Figure 2. Excess relative risk<sup>a</sup> (%) of all-age all-cause mortality per IQR increases in selected PM<sub>2.5</sub> species estimated by individual-lag model, in Xi'an, China, 2006-2008. IQR: interquartile range. PM<sub>2.5</sub>: particulate matter less than 2.5 μm in aerodynamic diameter. <sup>a</sup>: Adjusted for temperature, RH, DOW and time trend. Bar: 95% confidence interval.

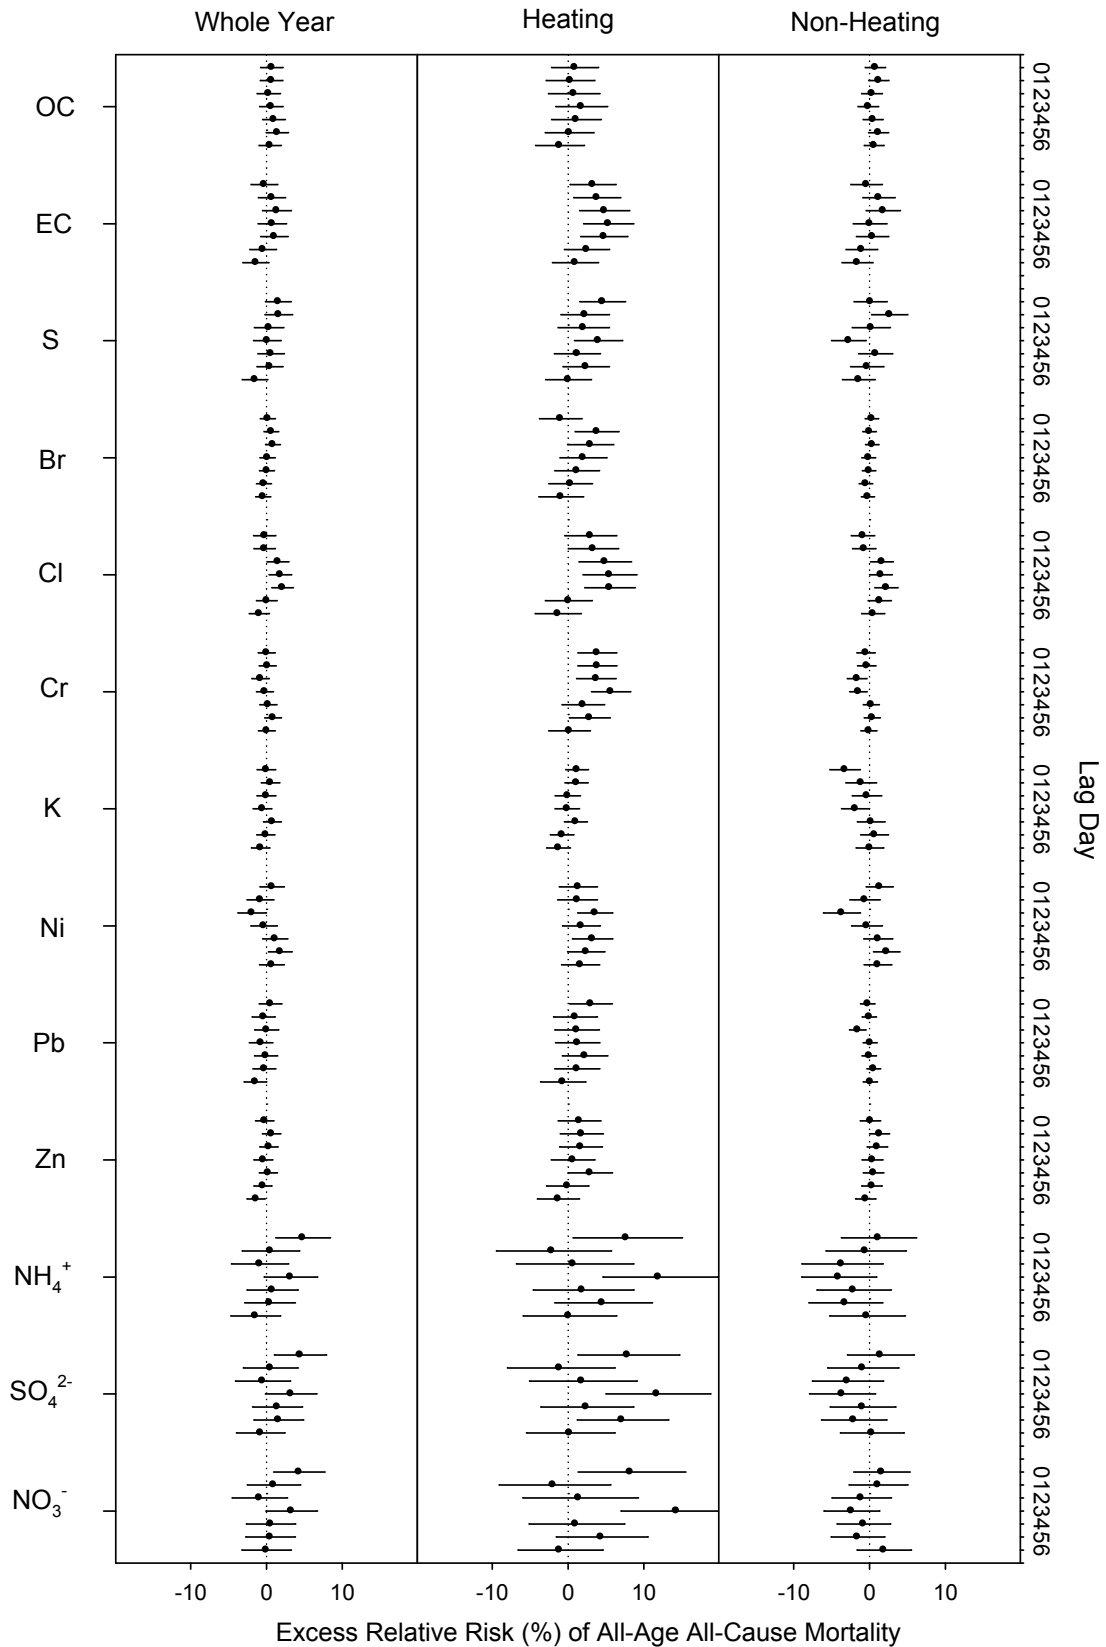

Web Figure 3. Excess relative risk<sup>a</sup> (%) of all-age cardiovascular mortality per IQR increases in selected PM<sub>2.5</sub> species estimated by individual-lag model, in Xi'an, China, 2006-2008. IQR: interquartile range. PM<sub>2.5</sub>: particulate matter less than 2.5 μm in aerodynamic diameter. <sup>a</sup>: Analysis adjusted for temperature, RH, DOW and time trend. Bar: 95% confidence interval.

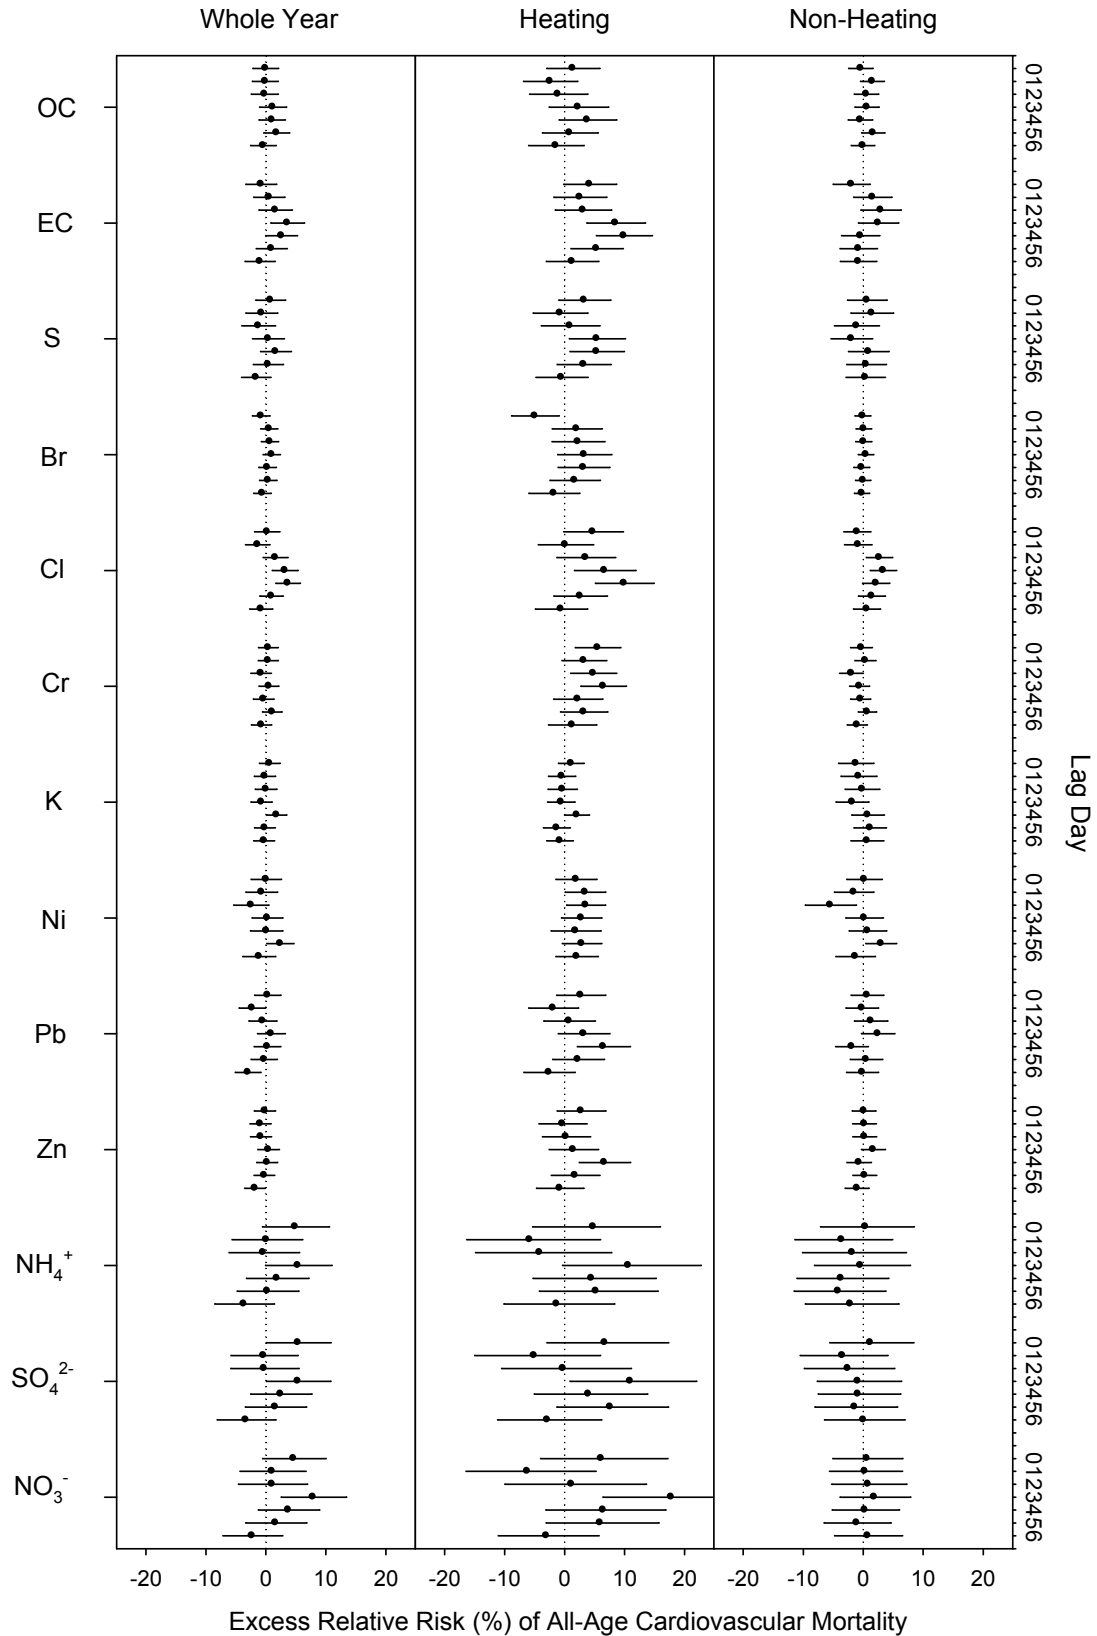



Web Figure 4. Excess relative risk<sup>a</sup> (%) of all-age respiratory mortality per IQR increases in selected PM<sub>2.5</sub> species estimated by individual-lag model, in Xi'an, China, 2006-2008. IQR: interquartile range. PM<sub>2.5</sub>: particulate matter less than 2.5 μm in aerodynamic diameter. <sup>a</sup>: Adjusted for temperature, RH, DOW and time trend. Bar: 95% confidence interval.

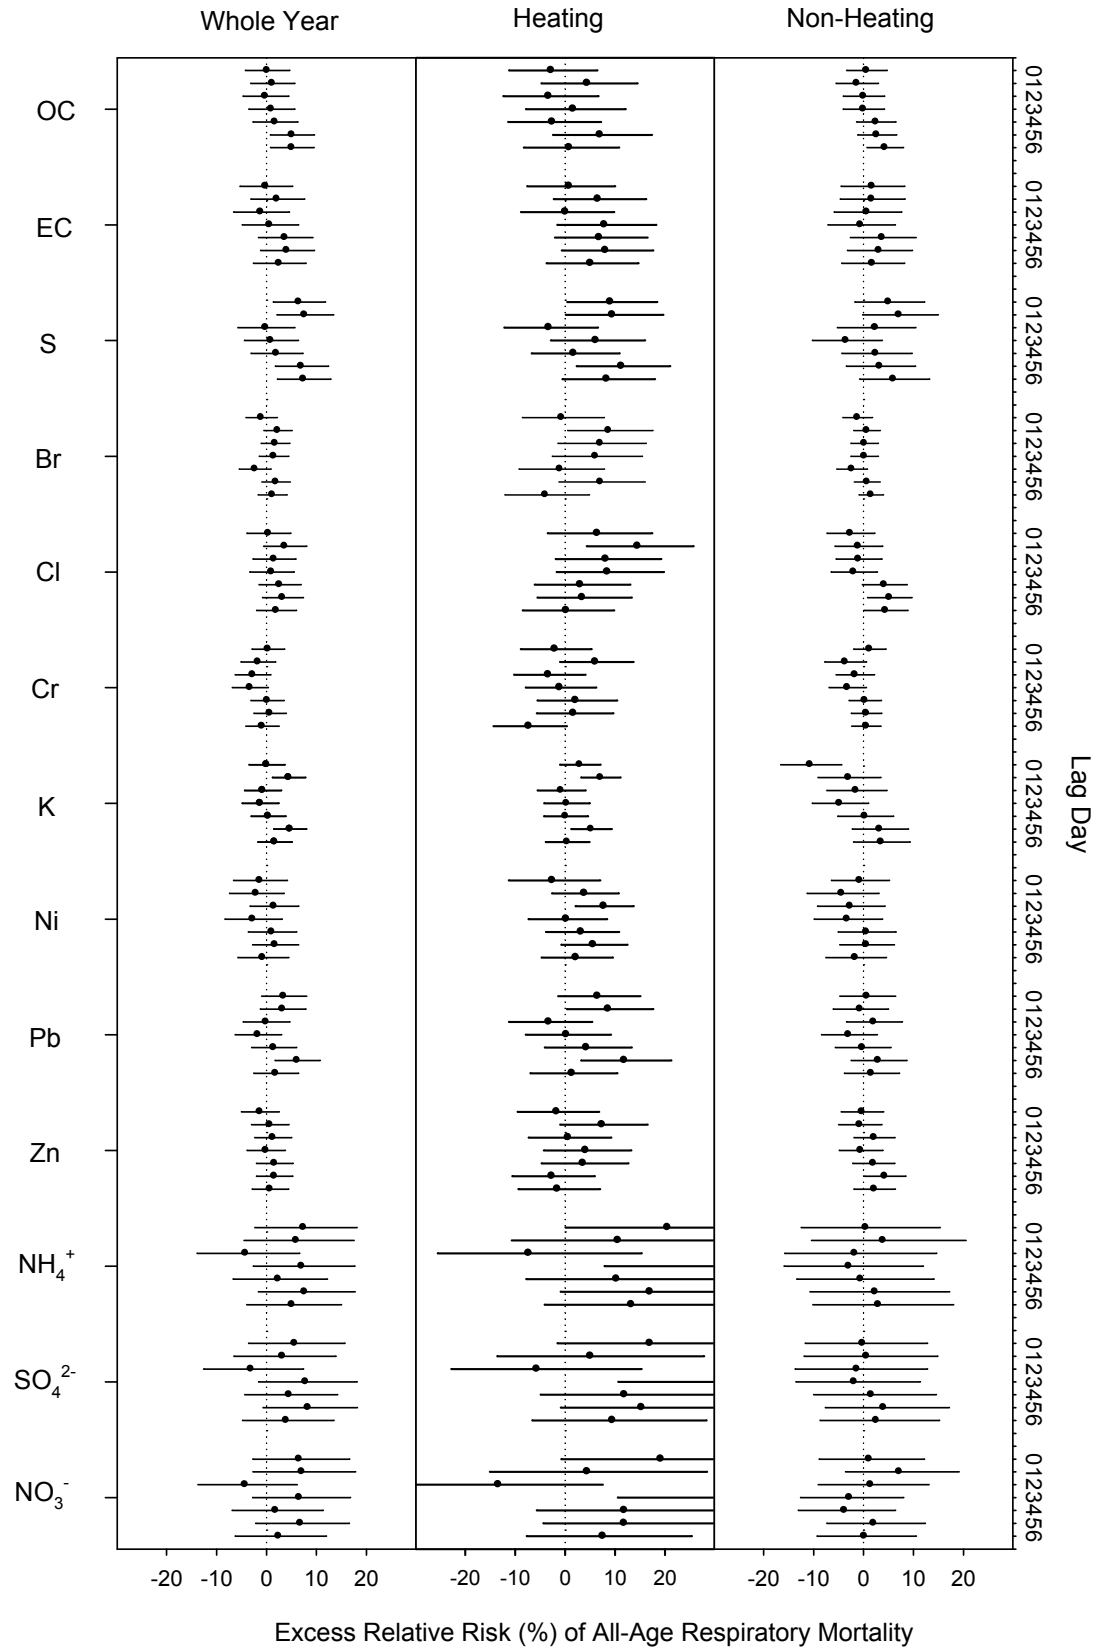

Web Figure 5. Excess relative risk<sup>a</sup> (%) of all-age coronary mortality per IQR increases in selected PM<sub>2.5</sub> species estimated by individual-lag model, in Xi'an, China, 2006-2008. IQR: interquartile range. PM<sub>2.5</sub>: particulate matter less than 2.5 μm in aerodynamic diameter. <sup>a</sup>: Adjusted for temperature, RH, DOW and time trend. Bar: 95% confidence interval.

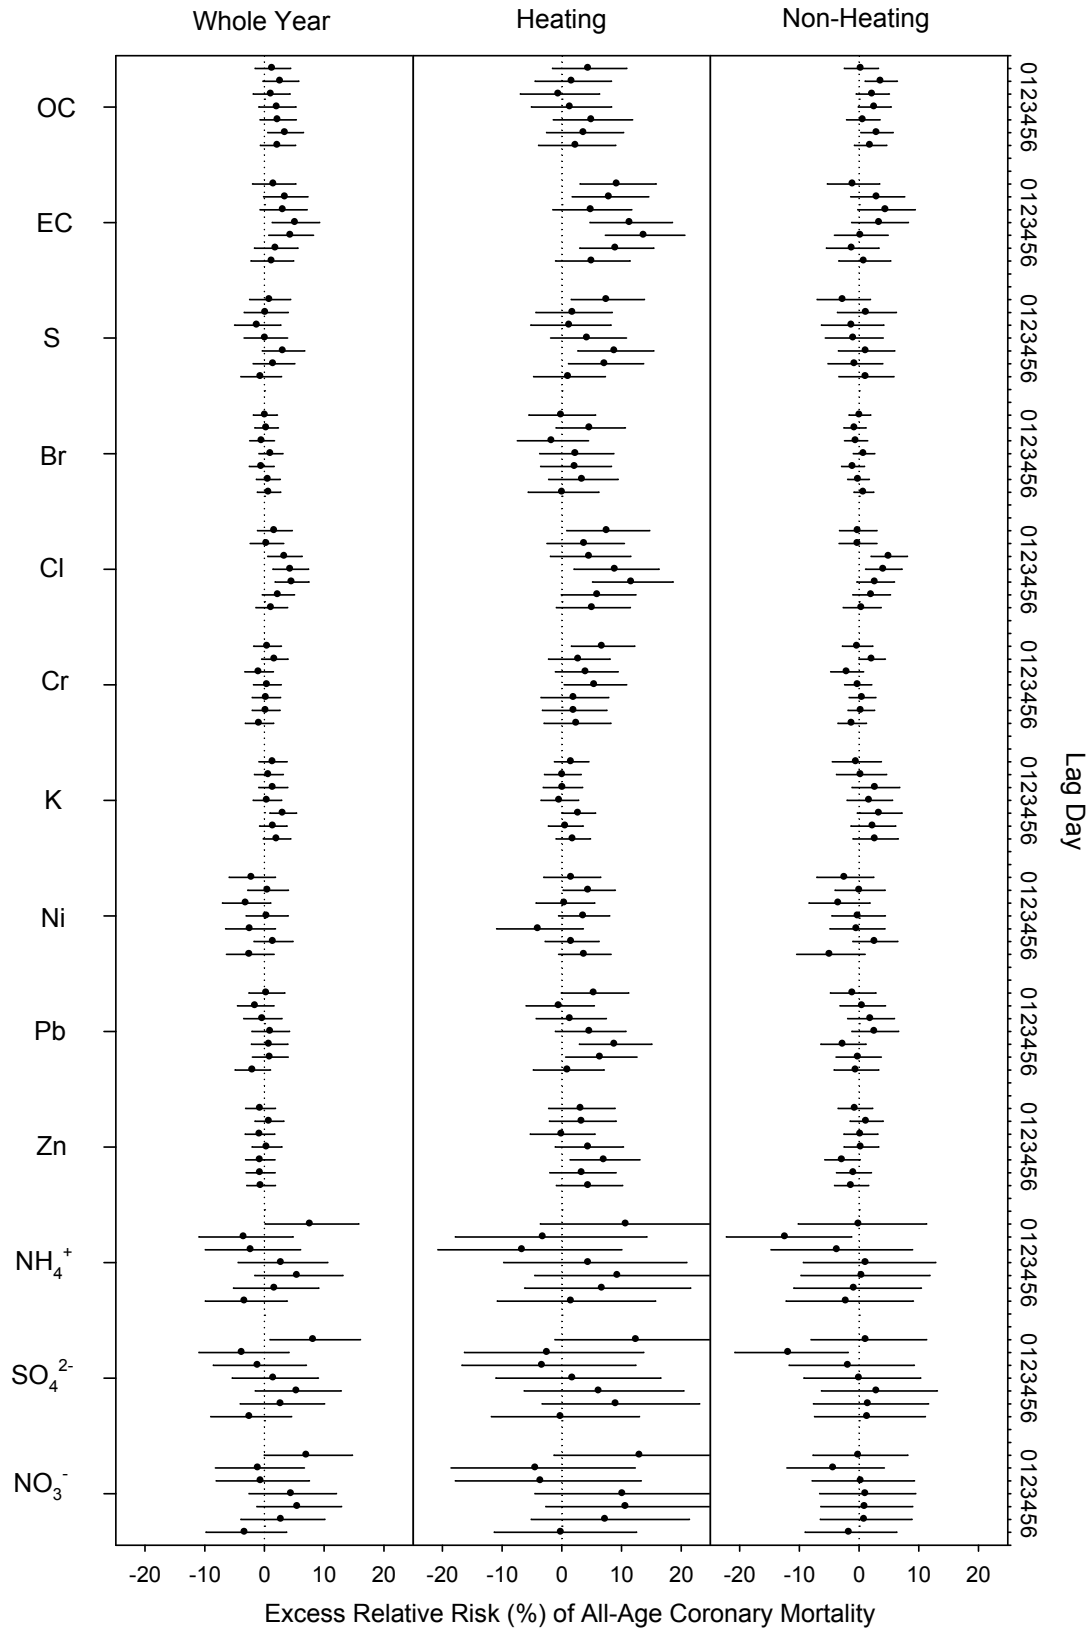

Supplement: supp_kwr342_kwr342_Web_Appendix.pdf [file supp_kwr342_kwr342_Web_Appendix.pdf]
